# Supplementary material for: Multiplex bacterial PCR in the bronchoalveolar lavage fluid of non-intubated patients with suspected pulmonary infection: a quasi-experimental study
Source: PubMed Central journal article supplement — ERJ Open Res. 2022 Apr 25;8(2):00595-2021. doi: 10.1183/23120541.00595-2021 (PMC9035597; doi:10.1183/23120541.00595-2021), 2022-04-25
Supplement: 00595-2021.SUPPLEMENT.pdf [file 00595-2021.SUPPLEMENT.pdf]

## Supplement

**S-Table 1:** Comorbidities of patients undergoing BAL for suspected pulmonary infection

| Characteristics                                    | N (%)    | Multiplex PCR | Conventional Culture | p-value |
|----------------------------------------------------|----------|---------------|----------------------|---------|
| Immunosuppressed                                   | 329 (54) | 234/417 (56)  | 95/188 (51)          | 0.22    |
| Solid organ transplantation                        | 116 (35) | 81 (35)       | 35 (37)              |         |
| Lung transplant                                    | 92 (79)  | 64 (79)       | 28 (80)              |         |
| Lung and Liver transplant                          | 3 (3)    | 1 (1)         | 2 (6)                |         |
| HSCT and other hematological conditions            | 77 (23)  | 51 (22)       | 26 (27)              |         |
| Chemotherapy                                       | 36 (11)  | 28 (12)       | 8 (8)                |         |
| GvHD lung                                          | 44 (13)  | 31 (13)       | 13 (14)              |         |
| Interstitial lung diseases                         | 17 (5)   | 11 (5)        | 6 (6)                |         |
| Leukemia                                           | 59 (10)  | 36 (15)       | 23 (24)              |         |
| HIV/AIDS                                           | 15 (5)   | 12 (5)        | 3 (3)                |         |
| Inflammatory bowel diseases                        | 8 (2)    | 7 (3)         | 1 (1)                |         |
| Malignant lymphoma                                 | 24 (7)   | 17 (8)        | 7 (7)                |         |
| Other immunosuppressive conditions*                | 26 (8)   | 18 (8)        | 8 (8)                |         |
| <b>Comorbidities in non-immunosuppressed cases</b> |          |               |                      |         |
| Cardiovascular and peripheral vascular diseases    | 123 (45) | 90/182 (49)   | 33/90 (37)           | 0.053   |
| Congestive heart failure                           | 129 (47) | 89/182 (49)   | 40/90 (44)           | 0.52    |
| Solid tumor                                        | 80 (29)  | 53/182 (29)   | 27/90 (30)           | 0.89    |
| COPD                                               | 97 (36)  | 62/182 (34)   | 35/90 (39)           | 0.50    |
| Kidney disease                                     | 42 (15)  | 33/182 (18)   | 9/90 (10)            | 0.11    |
| Diabetes mellitus                                  | 37 (14)  | 25/182 (14)   | 12/90 (13)           | 1.00    |
| Depression                                         | 36 (13)  | 26/182 (14)   | 10/90 (11)           | 0.57    |
| Peptic ulcer disease                               | 29 (11)  | 19/182 (10)   | 10/90 (11)           | 0.84    |
| Liver disease                                      | 16 (6)   | 11/182 (6)    | 5/90 (6)             | 1.00    |
| Cerebrovascular disease                            | 35 (13)  | 21/182 (12)   | 14/90 (16)           | 0.34    |
| Other**                                            | 35 (13)  | 22/182 (12)   | 13/90 (14)           |         |

\*Other immunosuppressive conditions include immunosuppressive therapy for bronchial asthma, multiple sclerosis, Myasthenia gravis, etc. \*\*Other includes connective tissue disease, bronchiectasis, alcohol abuse, musculoskeletal disease and dementia.

H SCT = Hematopoietic stem cell transplantation; GvHD = graft vs host disease.

**S-Table 2:** Pathogens not included in Curetis Unyvero - P50 assay identified with culture

| <b>Pathogens</b>                  | <b>N</b> |
|-----------------------------------|----------|
| <i>Bordetella species</i>         | 1        |
| <i>Citrobacter koseri</i>         | 3        |
| <i>Enterobacteriaceae</i>         | 8        |
| <i>Enterococcus</i>               | 5        |
| <i>Haemophilus parainfluenzae</i> | 1        |
| <i>Neisseria meningitidis</i>     | 1        |
| <i>Streptococcus pyogenes</i>     | 1        |

**S-Table 3:** The difference in non-panel pathogens identified in the 2-week on (PCR and conventional methods) vs the one-week off (conventional methods only) group.

| <b>2-week on group</b>            | <b>1-week off group</b> |
|-----------------------------------|-------------------------|
| <i>Haemophilus parainfluenzae</i> |                         |
| <i>Neisseria meningitidis</i>     |                         |
| <i>Streptococcus pyogenes</i>     |                         |
| <i>Citrobacter koseri</i>         |                         |

**S-Table 4:** Samples positive for resistance genes as measured by the Multiplex PCR panel, stratified according to conventional culture in-panel pathogen result and corresponding antibiotic resistance antibiogram.

| Antibiotics tested in the conventional culture antibiogram | Resistance genes detected by Curetis | Positive Curetis AB Resistance Gene | Conventional Culture In-panel Positive Pathogen result | Conventional Culture In-panel Pathogen Negative result | Curetis positive cases tested with conventional culture antibiogram | Conventional Culture Cases Positive for AB Resistance in antibiogram |
|------------------------------------------------------------|--------------------------------------|-------------------------------------|--------------------------------------------------------|--------------------------------------------------------|---------------------------------------------------------------------|----------------------------------------------------------------------|
| Oxacillin                                                  | <i>mecA</i>                          | 3                                   | 2                                                      | 1                                                      | 2                                                                   | 0                                                                    |
| Penicillin                                                 | <i>shv</i>                           | 2                                   | 1                                                      | 1                                                      | 1                                                                   | 1                                                                    |
|                                                            | <i>tem</i>                           | 30                                  | 12                                                     | 18                                                     | 16                                                                  | 7                                                                    |
| 3 <sup>rd</sup> generation Cephalosporins                  | <i>ctx-M</i>                         | 3                                   | 0                                                      | 3                                                      | 1                                                                   | 0                                                                    |
|                                                            | <i>dha</i>                           | 0                                   |                                                        |                                                        |                                                                     |                                                                      |
|                                                            | <i>tem-shv</i>                       | 0                                   |                                                        |                                                        |                                                                     |                                                                      |
| Macrolide                                                  | <i>ermA</i>                          | 4                                   | 2                                                      | 2                                                      | 3                                                                   | 2                                                                    |
|                                                            | <i>ermB</i>                          | 98                                  | 23                                                     | 75                                                     | 38                                                                  | 3                                                                    |
|                                                            | <i>ermC</i>                          | 15                                  | 4                                                      | 11                                                     | 9                                                                   | 2                                                                    |
|                                                            | <i>msrA</i>                          | 1                                   | 0                                                      | 1                                                      | 0                                                                   | 0                                                                    |
|                                                            | <i>mefA</i>                          | 41                                  | 11                                                     | 30                                                     | 22                                                                  | 2                                                                    |
| Carbapenem                                                 | <i>kpc</i>                           | 1                                   | 0                                                      | 1                                                      | 0                                                                   | 0                                                                    |
|                                                            | <i>Oxa-51</i>                        | 1                                   | 0                                                      | 1                                                      | 0                                                                   | 0                                                                    |
| Sulfanomide                                                | <i>sul1</i>                          | 5                                   | 3                                                      | 2                                                      | 3                                                                   | 3                                                                    |
| Fluoroquinolone                                            | <i>gyrA832_Pseu</i>                  | 10                                  | 4                                                      | 6                                                      | 5                                                                   | 3                                                                    |
|                                                            | <i>gyrA833_Pseu</i>                  | 6                                   | 2                                                      | 4                                                      | 3                                                                   | 0                                                                    |
|                                                            | <i>gyrA872_Pseu</i>                  | 6                                   | 0                                                      | 6                                                      | 1                                                                   | 0                                                                    |
|                                                            | <i>gyrA873_Pseu</i>                  | 5                                   | 1                                                      | 4                                                      | 2                                                                   | 0                                                                    |
|                                                            | <i>gyrA83_Ecoli</i>                  | 5                                   | 1                                                      | 4                                                      | 3                                                                   | 1                                                                    |
|                                                            | <i>gyrA87_Ecoli</i>                  | 5                                   | 1                                                      | 4                                                      | 4                                                                   | 1                                                                    |
|                                                            | <i>parCPseu</i>                      | 8                                   | 3                                                      | 5                                                      | 4                                                                   | 0                                                                    |
| Multi-Drug                                                 | <i>Int 1</i>                         | 3                                   | 2                                                      | 1                                                      | na                                                                  | na                                                                   |

**S-Table 5:** Pathogen detection using conventional culture and multiplex PCR stratified according to length of hospital stay before the bronchoscopy.

|                                   | Culture |        | Multiplex PCR |        |
|-----------------------------------|---------|--------|---------------|--------|
|                                   | ≤2 days | ≥3days | ≤2 days       | ≥3days |
| <i>Acinetobacter baumannii</i>    | 2       | 0      | 4             | 2      |
| <i>Chlamydophila pneumoniae</i>   | 0       | 0      | 1             | 0      |
| <i>Enterobacter spp</i>           | 6       | 5      | 0             | 0      |
| <i>Escherichia coli</i>           | 6       | 9      | 2             | 5      |
| <i>Haemophilus influenzae</i>     | 7       | 2      | 12            | 2      |
| <i>Klebsiella oxytoca</i>         | 0       | 0      | 0             | 1      |
| <i>Klebsiella pneumoniae</i>      | 1       | 4      | 2             | 1      |
| <i>Legionella pneumophila</i>     | 0       | 0      | 1             | 0      |
| <i>Moraxella catarrhalis</i>      | 1       | 0      | 3             | 2      |
| <i>Morganella morganii</i>        | 0       | 0      | 0             | 0      |
| <i>Proteus spp.</i>               | 0       | 0      | 1             | 0      |
| <i>Pseudomonas aeruginosa</i>     | 6       | 7      | 5             | 6      |
| <i>Serratia marcescens</i>        | 0       | 4      | 1             | 4      |
| <i>Staphylococcus aureus</i>      | 8       | 6      | 8             | 3      |
| <i>Stenotrophomas maltophilia</i> | 2       | 5      | 3             | 5      |
| <i>Streptococcus mitis group</i>  | 6       | 2      | 11            | 4      |
| Total                             | 45      | 44     | 54            | 35     |

**S-Table 6a:** The number of times pathogens were detected by conventional methods stratified to immune status.

| Culture (all pathogens)           | Immunocompromised | Immunocompetent |
|-----------------------------------|-------------------|-----------------|
| <i>Citrobacter koseri</i>         | 1                 | 2               |
| <i>Haemophilus parainfluenzae</i> | 0                 | 1               |
| <i>Neisseria meningitidis</i>     | 0                 | 1               |
| <i>Bordetella spp.</i>            | 0                 | 1               |
| <i>Streptococcus pyogenes</i>     | 1                 | 0               |
| <i>Enterobacteriaceae</i>         | 1                 | 4               |
| <i>Enterococcus</i>               | 3                 | 2               |
| <i>Streptococcus pneumoniae</i>   | 3                 | 5               |
| <i>Streptococcus mitis group</i>  | 3                 | 4               |
| <i>Acinetobacter baumannii</i>    | 1                 | 1               |
| <i>Chlamydomphila pneumoniae</i>  | 0                 | 0               |
| <i>Escherichia coli</i>           | 6                 | 4               |
| <i>Haemophilus influenzae</i>     | 5                 | 7               |
| <i>Klebsiella oxytoca</i>         | 0                 | 1               |
| <i>Klebsiella pneumoniae</i>      | 2                 | 2               |
| <i>Legionella pneumophila</i>     | 0                 | 0               |
| <i>Moraxella catarrhalis</i>      | 1                 | 2               |
| <i>Morganella morganii</i>        | 0                 | 0               |
| <i>Proteus spp.</i>               | 0                 | 0               |
| <i>Pseudomonas aeruginosa</i>     | 8                 | 7               |

|                                   |    |    |
|-----------------------------------|----|----|
| <i>Serratia marcescens</i>        | 2  | 2  |
| <i>Staphylococcus aureus</i>      | 11 | 7  |
| <i>Stenotrophomas maltophilia</i> | 3  | 4  |
|                                   | 51 | 57 |

**S-Table 6b:** The number of times pathogens were detected by multiplex PCR stratified to immune status.

| Curetis                           | Immunocompromised | Immunocompetent |
|-----------------------------------|-------------------|-----------------|
| <i>Acinetobacter baumannii</i>    | 4                 | 3               |
| <i>Chlamydophila pneumoniae</i>   | 1                 | 0               |
| <i>Enterobacter spp</i>           | 16                | 11              |
| <i>Escherichia coli</i>           | 5                 | 3               |
| <i>Haemophilus influenzae</i>     | 9                 | 19              |
| <i>Klebsiella oxytoca</i>         | 0                 | 2               |
| <i>Klebsiella pneumoniae</i>      | 1                 | 2               |
| <i>Legionella pneumophila</i>     | 1                 | 0               |
| <i>Moraxella catarrhalis</i>      | 4                 | 4               |
| <i>Morganella morganii</i>        | 2                 | 0               |
| <i>Proteus spp.</i>               | 0                 | 1               |
| <i>Pseudomonas aeruginosa</i>     | 10                | 8               |
| <i>Serratia marcescens</i>        | 2                 | 3               |
| <i>Staphylococcus aureus</i>      | 10                | 7               |
| <i>Stenotrophomas maltophilia</i> | 4                 | 5               |
| <i>Streptococcus mitis group</i>  | 9                 | 15              |
|                                   | 62                | 72              |
